# Supplementary material
Source: PubMed Central journal article supplement (PMC3175379)
Supplement: NIHMS318661-supplement-01.pdf [file NIHMS318661-supplement-01.pdf]

# THE LANCET **Neurology**

## **Supplementary webappendix**

This webappendix formed part of the original submission and has been peer reviewed. We post it as supplied by the authors.

Supplement to: Murray ME, Graff-Radford NR, Ross OA, et al. Neuropathologically defined subtypes of Alzheimer's disease with distinct clinical characteristics: a retrospective study. *Lancet Neurol* 2011; published online July 28. DOI:10.1016/S1474-4422(11)70156-9.

**Supplemental Figure 1.**

Hippocampal area was quantified for each case by manually tracing the posterior hippocampus at the level of the lateral geniculate nucleus (LGN) using standard landmarks to define the perimeter. The thickness of the CA1-subiculum border was measured below the dentate gyrus (DG) and defined in triplicate to average any differences along its length.

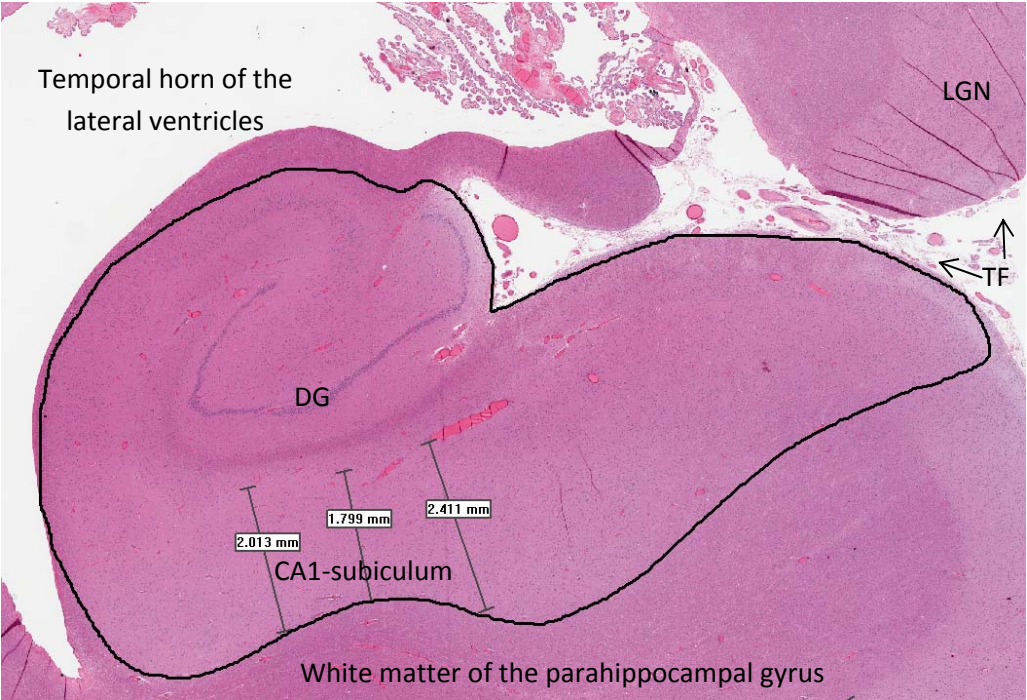

Abbreviations: LGN – lateral geniculate nucleus, DG – dentate gyrus, CA1- cornu Ammonis, TF – transverse fissure of Bichat.

### Supplemental Table 1.

There was no difference in the distribution of AD subtypes depending upon the referral source.

| Referral source | Hippocampal sparing | Typical AD | Limbic predominant |                      |
|-----------------|---------------------|------------|--------------------|----------------------|
| ADC             | 15 (10%)            | 113 (73%)  | 27 (17%)           |                      |
| ADI             | 64 (11%)            | 441 (75%)  | 84 (14%)           |                      |
| Consults        | 18 (21%)            | 49 (75%)   | 6 (5%)             |                      |
| SPSP            | 5 (17%)             | 22 (75%)   | 2 (7%)             | $\chi^2$ ; p = 0.176 |
| EAS             | 0 (0%)              | 16 (76%)   | 5 (24%)            |                      |
| PDC             | 0 (0%)              | 17 (77%)   | 5 (23%)            |                      |
| FADRC           | 1 (13%)             | 7 (88%)    | 0 (0%)             |                      |

ADC = Mayo Clinic Jacksonville Memory Disorder Clinic, ADI= State of Florida Alzheimer Disease Initiative; Consults=hospital consults; SPSP=Society for Progressive Supranuclear Palsy brain bank; EAS=Einstein Aging Study; PDC=Mayo Clinic Jacksonville Movement Disorder Clinic; FADRC= Florida Alzheimer's Disease Research Center

### Supplemental Table 2.

The patients from sources not specializing in aging and dementia (PDC, SPSP, consults) showed similar distribution of age at death for AD subtypes (only medians are reported, given the smaller sample size).

| Referral source          | Hippocampal sparing | Typical AD | Limbic predominant |
|--------------------------|---------------------|------------|--------------------|
| Consults                 | 71                  | 81         | 91                 |
| SPSP                     | 69                  | 73         | 72                 |
| PDC                      | 0                   | 83         | 88                 |
| All non-AD study sources | 69                  | 80         | 88                 |

Consults=hospital consults; SPSP=Society for Progressive Supranuclear Palsy brain bank; PDC=Mayo Clinic Jacksonville Movement Disorder Clinic

### Supplemental Table 3.

The *MAPT* finding remained significant even after excluding cases from parkinsonian referral sources (ie SPSP and PDC).

| <i>MAPT</i>         | H1H1      | non-H1H1  |                       |
|---------------------|-----------|-----------|-----------------------|
| Hippocampal sparing | 21 (46%)  | 25 (54%)  |                       |
| Typical             | 190 (60%) | 126 (40%) | $\chi^2$ ; p = 0.0236 |
| Limbic predominant  | 52 (69%)  | 23 (31%)  |                       |

**Supplemental Table 4.**

A Chi-square analysis was run on 775 cases that came to the brain bank through sources where the focus of clinical research is on aging and dementia (Mayo Clinic Jacksonville Memory Disorder Clinic, State of Florida Alzheimer Disease Initiative; Einstein Aging Study; Florida Alzheimer's Disease Research Center) to determine if the atypical clinical diagnoses was influenced by referral source after excluding cases from sources not specializing in aging and dementia disorders.

| Characteristic AD referral source               | AD subtypes |              |            | Statistics |              |
|-------------------------------------------------|-------------|--------------|------------|------------|--------------|
|                                                 | HpSp        | Typical      | LP         | <i>p</i>   | (stat test)  |
| Number (% total of n=889)                       | 81 (10%)    | 578 (75%)    | 116 (15%)  |            |              |
| Age, mean yr. (SD)                              | 73 (9)      | 79 (10)      | 86 (6)     | <0.001     | (ANOVA)      |
| Females (% total of AD type)                    | 29 (36%)    | 323 (56%)    | 81 (70%)   | <0.001     | (chi-square) |
| Atypical clinical/Total<br>(% total of AD type) | 21/81 (28%) | 67/578 (13%) | 5/116 (5%) | <0.001     | (chi-square) |

### Supplemental Table 5.

Three multiple logistic regressions were performed individually between the AD types to test whether *MAPT* remained significant in limbic predominant cases when controlling for presence of Lewy body pathology (including brainstem (BLBD), transitional (TLBD) and diffuse (DLBD) types).

Multiple Logistic Equations: AD type (0 vs. 1) = LBD + MAPT

| Dependent variable<br>(AD type)                                                                          | P value |       | Odds Ratio |      |
|----------------------------------------------------------------------------------------------------------|---------|-------|------------|------|
|                                                                                                          | LBD     | MAPT  | LBD        | MAPT |
| Hippocampal sparing (0) vs. Typical AD (1)                                                               | 0.013   | 0.064 | 3.35       | 1.75 |
| Typical AD (0) vs. Limbic predominant (1)                                                                | 0.78    | 0.083 | 0.92       | 1.60 |
| Hippocampal sparing (0) vs. Limbic predominant (1)                                                       | 0.043   | 0.003 | 3.06       | 2.99 |
| <b>Note:</b> LBD – 0 = no BLBD, TLBD, or DLBD in postmortem diagnosis; MAPT – 0 = H2H2 or H1H2, 1 = H1H1 |         |       |            |      |

## Supplemental Table 6.

### Validation cohort from Alzheimer Disease Patient Registry/Mayo Clinic Study on Aging

| Characteristic                               | AD subtypes      |                  |                  | Statistics     |                |
|----------------------------------------------|------------------|------------------|------------------|----------------|----------------|
|                                              | HpSp             | Typical          | LP               | <i>p-value</i> | test           |
| Number (% total of n=113)                    | 9 (8%)           | 80 (69%)         | 24 (21%)         |                |                |
| Age, mean yr. (SD)                           | 78 (9)           | 86 (7)           | 90 (5)           | <0.001         | ANOVA          |
| Females (% total of AD type)                 | 4 (44%)          | 48 (60%)         | 16 (67%)         | 0.509          | chi-square     |
| Education, mean yr. (SD)                     | 15 (4)           | 14 (3)           | 13 (3)           | 0.515          | ANOVA          |
| <b>Postmortem findings</b>                   |                  |                  |                  |                |                |
| NFT Braak stage, median (IQR)                | 6 (5.0-6.0)      | 6 (5.0-6.0)      | 6 (5.0-6.0)      | 0.531          | ANOVA on ranks |
| <b>Neurofibrillary tangle counts</b>         |                  |                  |                  |                |                |
| CA1, median (IQR)                            | 5 (3,7)          | 12 (3,17)        | 18 (13,29)       | <0.001         | ANOVA on ranks |
| Subiculum, median (IQR)                      | 11 (8,15)        | 16 (10,29)       | 44 (34,54)       | <0.001         | ANOVA on ranks |
| Superior temporal, median (IQR)              | 16 (12,22)       | 8 (3,15)         | 4 (2,8)          | <0.001         | ANOVA on ranks |
| Inferior parietal, median (IQR)              | 11 (8,16)        | 6 (1,9)          | 2 (1,5)          | <0.001         | ANOVA on ranks |
| Mid-frontal, median (IQR)                    | 14 (10,18)       | 4 (1,9)          | 2 (1,4)          | <0.001         | ANOVA on ranks |
| <b>Clinical findings</b>                     |                  |                  |                  |                |                |
| Age of onset, mean yr. (SD)                  | 69 (9)           | 75 (8)           | 79 (7)           | 0.007          | ANOVA          |
| Disease duration, mean yr. (SD)              | 9 (2)            | 10 (4)           | 11 (5)           | 0.502          | ANOVA          |
| Atypical clinical/Total (% total of AD type) | 3/9 (33%)        | 4/80 (5%)        | 0/24 (0%)        | <0.001         | chi-square     |
| <b>MMSE</b>                                  |                  |                  |                  |                |                |
| Initial score, median (IQR)*                 | 25 (21,27)       | 26 (12,28)       | 25 (24,27)       | 0.880          | ANOVA on ranks |
| Final score, median (IQR)*                   | 12 (7,16)        | 14 (9,20)        | 13 (9,18)        | 0.703          | ANOVA on ranks |
| Longitudinal decline, median (IQR)*          | -2.8 (-4.3,-1.8) | -2.1 (-3.2,-1.0) | -1.4 (-2.1,-0.6) | 0.040          | ANOVA on ranks |

Abbreviations: HpSp – hippocampal sparing (HS), Typical – classic progression of AD from limbic regions to cortex (T), LP – limbic predominant (LP), SD – standard deviation, IQR – interquartile range, ANOVA – analysis of variance; Total refers to the number of cases evaluated out of the group. \*Median MMSE score assessed within 3 years of symptom onset (initial) or death (final).



**Supplemental Table 7.**

A series of AD cases that had were not included in the original algorithmic classification cohort were classified into subtypes by a neuropathologist using a Gestalt diagnosis and compared to subsequent algorithmic classification. Using the algorithmic classification as the “gold standard,” the following sensitivity and specificity measures were calculated:

| <i>AD type</i>             | <i>Sensitivity</i> | <i>Specificity</i> |
|----------------------------|--------------------|--------------------|
| <b>Hippocampal sparing</b> | 67%                | 93%                |
| <b>Typical AD</b>          | 81%                | 61%                |
| <b>Limbic predominant</b>  | 58%                | 92%                |
